# Supplementary material for: ICU Nurses’ Knowledge, Attitudes, and Practices in Identifying Patient–Ventilator Asynchrony: A Cross-Sectional Study
Source: Research Square preprint supplement (doi:10.21203/rs.3.rs-8008446/v1), 2025-12-10
Supplement: Supplementary file 1 [file 4924c604f46e26582d980bbd.docx]

**Ethical Statement**

Dear Editor,

We hereby declare that the study titled:**“ICU Nurses’ Knowledge, Attitudes, and Practices in Identifying Patient–Ventilator Asynchrony: A Cross-Sectional Study”**This study is a non-interventional, anonymous cross-sectional survey involving ICU nurses. It does not involve any patient data, clinical interventions, or personal information. The study adheres strictly to relevant ethical guidelines and regulations, including the Declaration of Helsinki, and received approval from the Ethics Committee of Jiangxi Cancer Hospital (Approval No. 2023KY123; approval date: July 10, 2023). The informed consent form details the purpose of the study and ensures the following: confidentiality and anonymity of participants' responses, as well as the right to withdraw from the study at any time. By completing and submitting the questionnaire, participants are deemed to have consented to participate in the study.

Sincerely,
Jie Peng
Principal Investigator
October 22, 2025
