# Supplementary material for: ICU Nurses’ Knowledge, Attitudes, and Practices in Identifying Patient–Ventilator Asynchrony: A Cross-Sectional Study
Source: Research Square preprint supplement (doi:10.21203/rs.3.rs-8008446/v1), 2025-12-10
Supplement: Supplementary file 2 [file 81f6435986e749d1d9f30cc4.docx]

**Table 1** Demographic and Professional Characteristics of ICU Nurses Participating in the Study

| Variables | | | Category | n (%) |
| --- | --- | --- | --- | --- |
| Type of ICU | | | General ICU | 60（28.30） |
|  |  |  | EICU | 39（18.40） |
|  |  |  | CCU | 28（13.21） |
|  |  |  | RICU | 35（16.51） |
|  |  |  | Other ICU | 50（23.58） |
| Gender | | | Male | 54（25.47） |
|  |  |  | Female | 158（74.53） |
| Age (years) | | | <25 | 22（10.38) |
|  |  |  | 25-30 | 82(38.68) |
|  |  |  | 31-35 | 67(31.60) |
|  |  |  | 36-40 | 41(19.34) |
| Educational Background | | | Associate Degree | 31(14.62) |
|  |  |  | Bachelor’s Degree | 173(81.60) |
|  |  |  | Master’s Degree | 8(3.78) |
| Length of ICU Experience (years) | | | <5 | 43(20.28) |
|  |  |  | 5-10 | 88(41.51) |
|  |  |  | >10 | 81(38.21) |
| Mechanical Ventilation Training | | | Yes, >100 Hours | 37(17.45) |
|  |  |  | Yes, <100 Hours | 47(22.17) |
|  |  |  | No | 128(60.38) |

Note.ICU = Intensive Care Unit; EICU = Emergency Intensive Care Unit; RICU = Respiratory Intensive Care Unit; CCU = Cardiac Care Unit.Data are presented as counts (percentages).

**Table 2** Summary of Nurses’ Scores on PVA Identification Competency, Attitudes, and Practices

| Variables | Score Range (points) | Mean ± SD (points) | Passing Rate (%) |
| --- | --- | --- | --- |
| Competency | 0–10 | 4.64±2.90 | 44.81% |
| Attitude | 14–50 | 38.48±8.71 | 60.85% |
| Practice | 12–50 | 32.59±9.62 | 44.34% |

Note. PVA = Patient–Ventilator Asynchrony; SD = standard deviation;The passing rate represents the proportion of nurses who achieved at least 60% of the maximum possible score in each dimension (Competency, Attitude, and Practice).

**Table 3** Associations Between PVA Identification Competency and Demographic and Professional Characteristics of ICU Nurses

| Variables | Mean ± SD (points) | 95%CI  (Lower - upper) | *t*-value | *p*-value |
| --- | --- | --- | --- | --- |
| Male | 5.31 ± 2.87 | 4.53 - 6.10 | 2.011 | 0.047 |
| Female | 4.41 ± 2.88 | 3.95 - 4.86 |
| Length of ICU Experience (years) |  |  |  |  |
| <5 | 3.44 ± 2.51 | 2.67 - 4.21 | 3.18 | 0.002 |
| 5-10 | 4.97 ± 2.71 | 4.39 - 5.54 |
| <5 | 3.44 ± 2.51 | 2.67 - 4.21 | 2.839 | 0.006 |
| >10 | 4.91 ± 3.15 | 4.22 - 5.61 |
| 5-10 | 4.97 ± 2.71 | 4.39 - 5.54 | 0.115 | 0.908 |
| >10 | 4.91 ± 3.15 | 4.22 - 5.61 |
| MV–Related Training |  |  |  |  |
| Trained | 7.65 ± 1.62 | 7.30 - 8.01 | 22.634 | <0.001 |
| Not Trained | 2.66 ± 1.50 | 2.39 - 2.92 |
| >100 hours of training | 8.30 ± 1.60 | 7.77 - 8.83 | 3.399 | 0.001 |
| <100 hours of training | 7.15 ± 1.46 | 6.72 - 7.58 |

Note:MV = Mechanical Ventilation; SD = Standard Deviation; CI = Confidence Interval.Group comparisons were conducted using independent samples t-test.Significant differences indicated by *P*-values <0.05.

**Table 4** Associations Between ICU Nurses’ Attitudes Toward Ventilator Waveform Monitoring and Their Demographic and Professional Characteristics

| Variables | Mean ± SD (points) | 95%CI  (Lower - upper) | *t*-value | *p*-value |
| --- | --- | --- | --- | --- |
| Male | 40.06 ± 7.62 | 37.98 - 42.14 | 1.676 | 0.097 |
| Female | 37.94 ± 9.01 | 36.53 - 39.36 |
| Length of ICU Experience (years) |  |  |  |  |
| <5 | 35.67 ± 8.25 | 33.14 - 38.21 | 2.434 | 0.017 |
| 5-10 | 39.42 ± 8.33 | 37.66 - 41.19 |
| <5 | 35.67 ± 8.25 | 33.14 - 38.21 | 2.027 | 0.046 |
| >10 | 38.95 ± 9.14 | 36.93 - 40.97 |
| 5-10 | 39.42 ± 8.33 | 37.66 - 41.19 | 0.348 | 0.728 |
| >10 | 38.95 ± 9.14 | 36.93 - 40.97 |
| MV–Related Training |  |  |  |  |
| Trained | 46.36 ± 3.33 | 45.63 - 47.08 | 17.931 | <0.001 |
| Not Trained | 33.31 ± 7.13 | 32.07 - 34.56 |
| >100 hours of training | 47.89 ± 3.00 | 46.89 - 48.89 | 4.105 | <0.001 |
| <100 hours of training | 45.15 ± 3.09 | 44.24 - 46.06 |

Note:MV = Mechanical Ventilation; SD = Standard Deviation; CI = Confidence Interval.Group comparisons were conducted using independent samples t-test.Significant differences indicated by *P*-values <0.05.

**Table 5** Associations Between ICU Nurses’ Practices in Ventilator Waveform Monitoring and Their Demographic and Professional Characteristics

| Variables | Mean ± SD (points) | 95%CI  (Lower - upper) | *t*-value | *p*-value |
| --- | --- | --- | --- | --- |
| Male | 34.19 ± 9.55 | 31.58 - 36.79 | 1.415 | 0.160 |
| Female | 32.05 ± 9.62 | 30.54 - 33.56 |
| Length of ICU Experience (years) |  |  |  |  |
| <5 | 28.72 ± 8.97 | 25.96 - 31.48 | 3.202 | 0.002 |
| 5-10 | 34.14 ± 9.33 | 32.16 - 36.11 |
| <5 | 28.72 ± 8.97 | 25.96 - 31.48 | 2.431 | 0.017 |
| >10 | 32.98 ± 9.83 | 30.80 - 35.15 |
| 5-10 | 34.14 ± 9.33 | 32.16 - 36.11 | 0.786 | 0.433 |
| >10 | 32.98 ± 9.83 | 30.80 - 35.15 |
| MV–Related Training |  |  |  |  |
| Trained | 41.58 ± 4.19 | 40.67 - 42.49 | 18.754 | <0.001 |
| Not Trained | 26.70 ± 7.34 | 25.41 - 27.98 |
| >100 hours of training | 44.30 ± 3.62 | 43.09 - 45.50 | 6.345 | <0.001 |
| <100 hours of training | 39.45 ± 3.29 | 38.48 - 40.41 |

Note. MV = mechanical ventilation; SD = standard deviation; CI = confidence interval. training hours were categorized as ≥100 vs. <100 total hours. Group comparisons were conducted using independent samples t-test.Significant differences indicated by *P*-values <0.05.

**Table 6** Correlations Among Nurses’ PVA Identification Competency, Attitudes, and Practices

| Variables | Pearson *r* | *p*-value |
| --- | --- | --- |
| Competency vs. Attitude | 0.863 | < 0.001 |
| Competency vs. Practice | 0.878 | < 0.001 |
| Attitude vs. Practice | 0.911 | < 0.001 |

Note. Pearson correlation coefficients; two-tailed tests. All correlations are statistically significant at *p* < 0.001.
